# Supplementary material for: Realizing efficient photoluminescence spectral modulation via Sb3+/Ln3+ co-doping in Cs2NaInCl6 double perovskites
Source: Royal Society of Chemistry journal article supplement (doi:10.1039/d3tc04548j), 2024-01-01
Supplement: d3tc04548j1.pdf [file d3tc04548j1.pdf]

## Supporting Information

### **Realizing Efficient Photoluminescence Spectral Modulation via Sb<sup>3+</sup>/Ln<sup>3+</sup> co-doped Doping in Cs<sub>2</sub>NaInCl<sub>6</sub> Double Perovskites**

Shuai Li, ‡<sup>a</sup> Chunrong Zhu, ‡<sup>a</sup> Jinjiang Wang,<sup>a</sup> Zheling Zhang,<sup>a</sup> Dongjie Wang,<sup>a</sup> Yiwen Chen,<sup>a</sup> Doudou Zhang,<sup>a</sup> Jing Wang,<sup>b</sup> and Jian Zhang\*<sup>a†</sup>

a. Engineering Research Center of Electronic Information Materials and Devices (Ministry of Education), Guangxi Key Laboratory of Information Materials, School of Materials Science and Engineering, Guilin University of Electronic and Technology, Guilin 541004, China

b. Ministry of Education Key Laboratory of Bioinorganic and Synthetic Chemistry, State Key Laboratory of Optoelectronic Materials and Technologies, School of Chemistry, Sun Yat-Sen University, Guangzhou, Guangdong 510275, China

‡ These authors contributed equally to this work.

\* Corresponding authors (Email: [jianzhang@guet.edu.cn](mailto:jianzhang@guet.edu.cn))

**Table S1.** Tb<sup>3+</sup> ion content for Tb<sup>3+</sup>-doped Cs<sub>2</sub>NaIn<sub>0.95</sub>Sb<sub>0.05</sub>Cl<sub>6</sub> samples studied using inductively coupled plasma emission spectrometry. Sb<sup>3+</sup> % and Tb<sup>3+</sup> % is calculated following the equation  $([Sb]/[In+Sb]) \times 100\%$  and  $([Tb]/[In+Sb]) \times 100\%$ , respectively.

| Samples                                                                                            | Precursor |           | Product            |                    |
|----------------------------------------------------------------------------------------------------|-----------|-----------|--------------------|--------------------|
|                                                                                                    | Sb / mmol | Tb / mmol | Sb <sup>3+</sup> % | Tb <sup>3+</sup> % |
| Tb <sup>3+</sup> -doped<br>Cs <sub>2</sub> NaIn <sub>0.95</sub> Sb <sub>0.05</sub> Cl <sub>6</sub> | 0.05      | 0         | 0.34               | 0                  |
|                                                                                                    | 0.05      | 0.5       | 0.43               | 0.79               |
|                                                                                                    | 0.05      | 1.0       | 0.37               | 1.76               |
|                                                                                                    | 0.05      | 1.5       | 0.31               | 2.48               |
|                                                                                                    | 0.05      | 2.0       | 0.31               | 3.70               |
|                                                                                                    | 0.05      | 2.5       | 0.23               | 5.49               |

**Table S2.** Ho<sup>3+</sup> ion content for Ho<sup>3+</sup>-doped Cs<sub>2</sub>NaIn<sub>0.95</sub>Sb<sub>0.05</sub>Cl<sub>6</sub> samples studied using inductively coupled plasma emission spectrometry. Sb<sup>3+</sup> % and Ho<sup>3+</sup> % is calculated following the equation  $([Sb]/[In+Sb]) \times 100\%$  and  $([Ho]/[In+Sb]) \times 100\%$ , respectively.

| Samples                                                                                            | Precursor |           | Product            |                    |
|----------------------------------------------------------------------------------------------------|-----------|-----------|--------------------|--------------------|
|                                                                                                    | Sb / mmol | Ho / mmol | Sb <sup>3+</sup> % | Ho <sup>3+</sup> % |
| Ho <sup>3+</sup> -doped<br>Cs <sub>2</sub> NaIn <sub>0.95</sub> Sb <sub>0.05</sub> Cl <sub>6</sub> | 0.05      | 0         | 0.34               | 0                  |
|                                                                                                    | 0.05      | 0.5       | 0.24               | 0.29               |
|                                                                                                    | 0.05      | 1.0       | 0.22               | 1.50               |
|                                                                                                    | 0.05      | 1.5       | 0.18               | 3.60               |
|                                                                                                    | 0.05      | 2.0       | 0.20               | 7.25               |
|                                                                                                    | 0.05      | 2.5       | 0.21               | 11.13              |

**Table S3.** The TRPL lifetimes monitored at 440 and 547 nm and energy transfer efficiency ( $\eta_{ET}$ ) for  $\text{Cs}_2\text{NaIn}_{0.95}\text{Sb}_{0.05}\text{Cl}_6: y\text{Tb}^{3+}$  samples.

| Samples                                                                              | Lifetime (440 nm) / $\mu\text{s}$ | Lifetime (547 nm) / ms | $\eta_{ET}$ / % |
|--------------------------------------------------------------------------------------|-----------------------------------|------------------------|-----------------|
| $\text{Cs}_2\text{NaIn}_{0.95}\text{Sb}_{0.05}\text{Cl}_6$                           | 1.02                              | —                      | —               |
| $\text{Cs}_2\text{NaIn}_{0.95}\text{Sb}_{0.05}\text{Cl}_6: 0.5 \text{ mmol Tb}^{3+}$ | 1.02                              | 6.34                   | 0.2%            |
| $\text{Cs}_2\text{NaIn}_{0.95}\text{Sb}_{0.05}\text{Cl}_6: 1.0 \text{ mmol Tb}^{3+}$ | 1.00                              | 6.35                   | 2.3%            |
| $\text{Cs}_2\text{NaIn}_{0.95}\text{Sb}_{0.05}\text{Cl}_6: 1.5 \text{ mmol Tb}^{3+}$ | 0.95                              | 6.60                   | 7.0%            |
| $\text{Cs}_2\text{NaIn}_{0.95}\text{Sb}_{0.05}\text{Cl}_6: 2.0 \text{ mmol Tb}^{3+}$ | 0.93                              | 6.62                   | 9.2%            |
| $\text{Cs}_2\text{NaIn}_{0.95}\text{Sb}_{0.05}\text{Cl}_6: 2.5 \text{ mmol Tb}^{3+}$ | 0.91                              | 6.64                   | 11.0%           |

**Table S4.** The TRPL lifetimes monitored at 440 and 655 nm and energy transfer efficiency ( $\eta_{ET}$ ) for  $\text{Cs}_2\text{NaIn}_{0.95}\text{Sb}_{0.05}\text{Cl}_6: z\text{Ho}^{3+}$  samples.

| Samples                                                                              | Lifetime (440 nm) / $\mu\text{s}$ | Lifetime (655 nm) / ms | $\eta_{ET}$ / % |
|--------------------------------------------------------------------------------------|-----------------------------------|------------------------|-----------------|
| $\text{Cs}_2\text{NaIn}_{0.95}\text{Sb}_{0.05}\text{Cl}_6$                           | 1.02                              | —                      | —               |
| $\text{Cs}_2\text{NaIn}_{0.95}\text{Sb}_{0.05}\text{Cl}_6: 0.5 \text{ mmol Ho}^{3+}$ | 0.95                              | 2.96                   | 6.7%            |
| $\text{Cs}_2\text{NaIn}_{0.95}\text{Sb}_{0.05}\text{Cl}_6: 1.0 \text{ mmol Ho}^{3+}$ | 0.92                              | 4.24                   | 10.3%           |
| $\text{Cs}_2\text{NaIn}_{0.95}\text{Sb}_{0.05}\text{Cl}_6: 1.5 \text{ mmol Ho}^{3+}$ | 0.82                              | 4.82                   | 20.0%           |
| $\text{Cs}_2\text{NaIn}_{0.95}\text{Sb}_{0.05}\text{Cl}_6: 2.0 \text{ mmol Ho}^{3+}$ | 0.77                              | 5.20                   | 24.6%           |
| $\text{Cs}_2\text{NaIn}_{0.95}\text{Sb}_{0.05}\text{Cl}_6: 2.5 \text{ mmol Ho}^{3+}$ | 0.75                              | 5.29                   | 27.0%           |

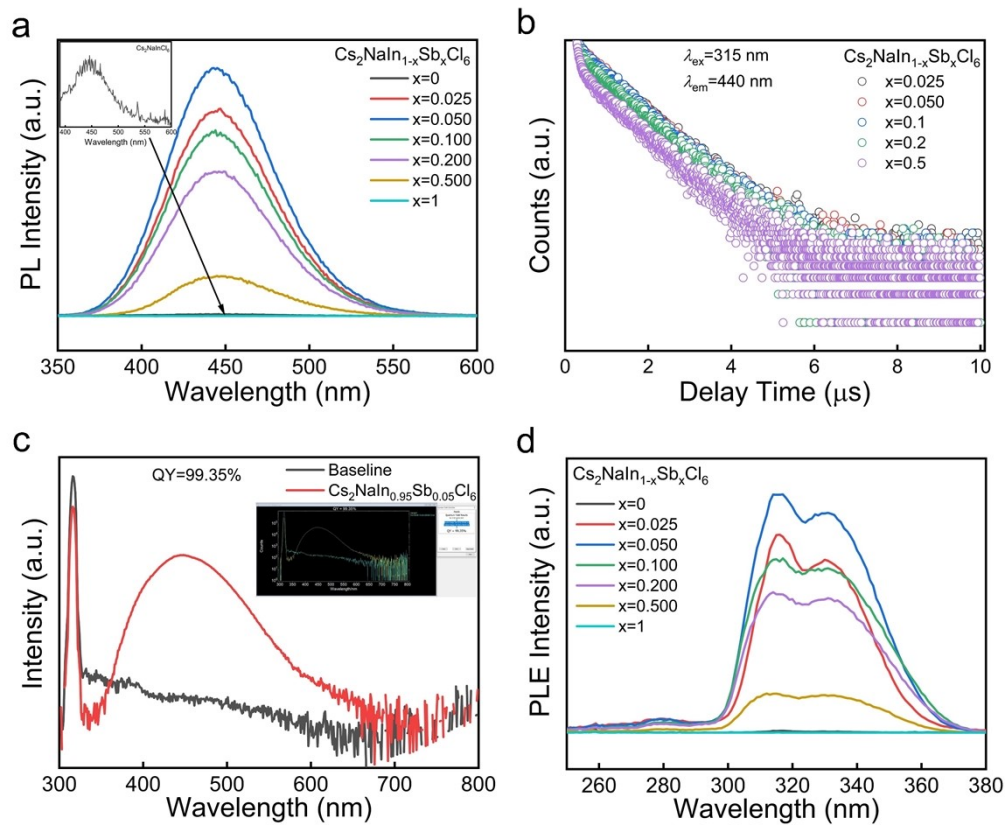

**Figure S1.** a) The PL spectra, b) TRPL decay curves, c) PLQY curves, and d) PLE spectra monitored at 440 nm of  $\text{Cs}_2\text{NaIn}_{1-x}\text{Sb}_x\text{Cl}_6$  DPs.

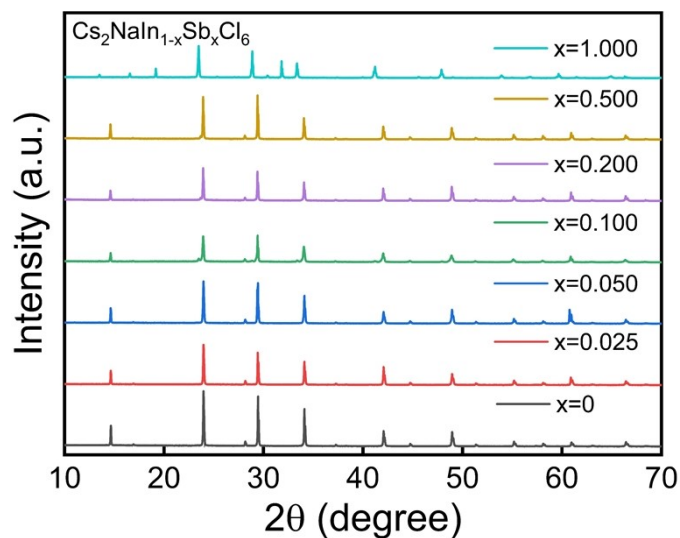

**Figure S2.** XRD patterns of the  $\text{Cs}_2\text{NaIn}_{1-x}\text{Sb}_x\text{Cl}_6$  crystals with different  $\text{Sb}^{3+}$  ion concentration.

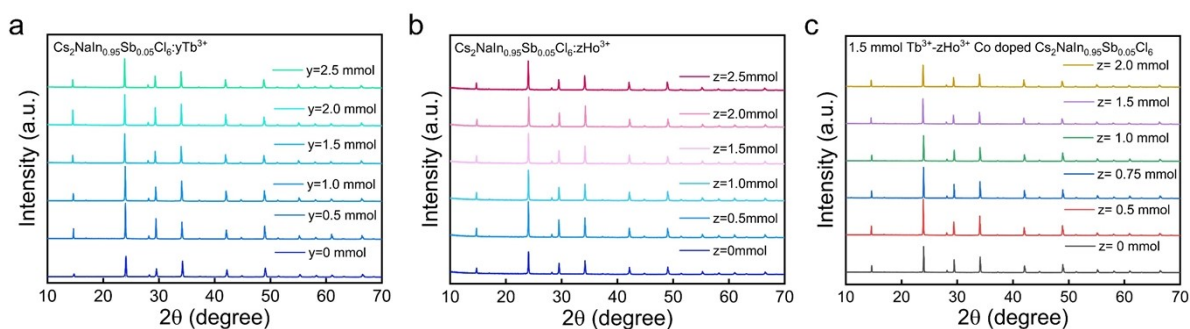

**Figure S3.** XRD patterns of a) the  $\text{Cs}_2\text{NaIn}_{0.95}\text{Sb}_{0.05}\text{Cl}_6: y\text{Tb}^{3+}$  crystals with different  $\text{Tb}^{3+}$  ion concentrations, b) the  $\text{Cs}_2\text{NaIn}_{0.95}\text{Sb}_{0.05}\text{Cl}_6: z\text{Ho}^{3+}$  crystals with different  $\text{Ho}^{3+}$  ion concentrations, and c) the  $\text{Tb}^{3+}$  and  $\text{Ho}^{3+}$  co-doped  $\text{Cs}_2\text{NaIn}_{0.95}\text{Sb}_{0.05}\text{Cl}_6$  crystals with different  $\text{Ho}^{3+}$  ion concentrations.

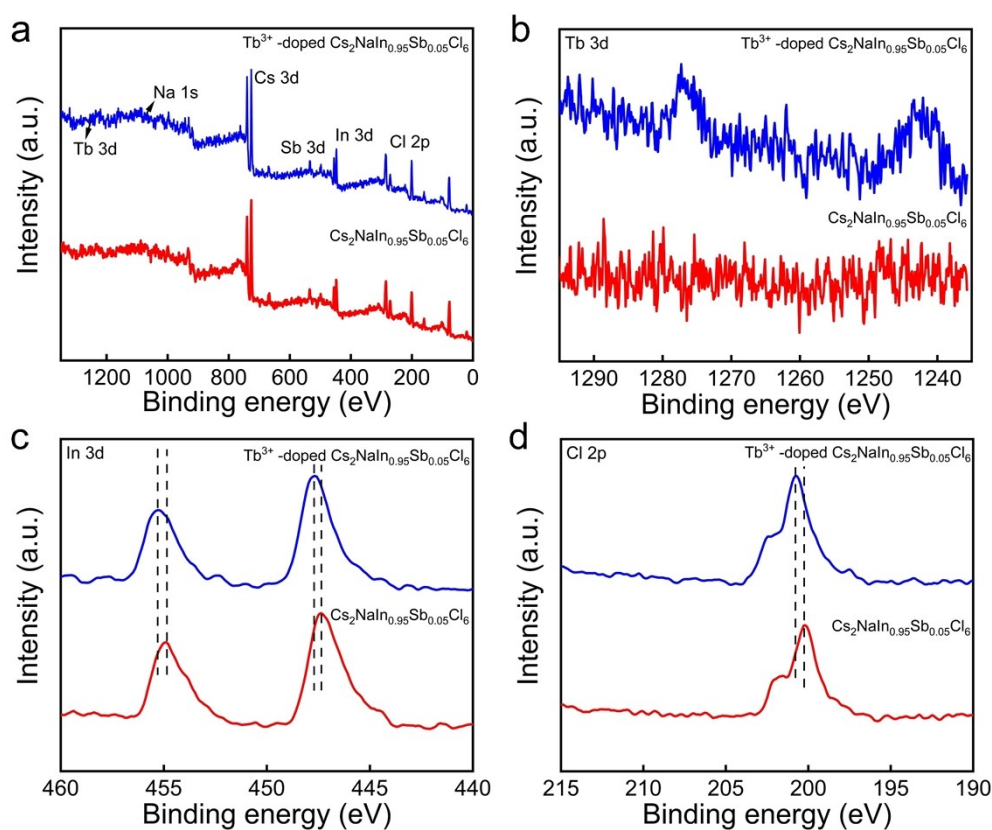

**Figure S4.** a) The XPS spectroscopy based on undoped and 1.5 mmol  $\text{Tb}^{3+}$ -doped  $\text{Cs}_2\text{NaIn}_{0.95}\text{Sb}_{0.05}\text{Cl}_6$  crystal. b) the XPS pattern for Tb 3d, c) In 3d, and d) Cl 2p of the undoped and 1.5 mmol  $\text{Tb}^{3+}$ -doped  $\text{Cs}_2\text{NaIn}_{0.95}\text{Sb}_{0.05}\text{Cl}_6$  crystal.

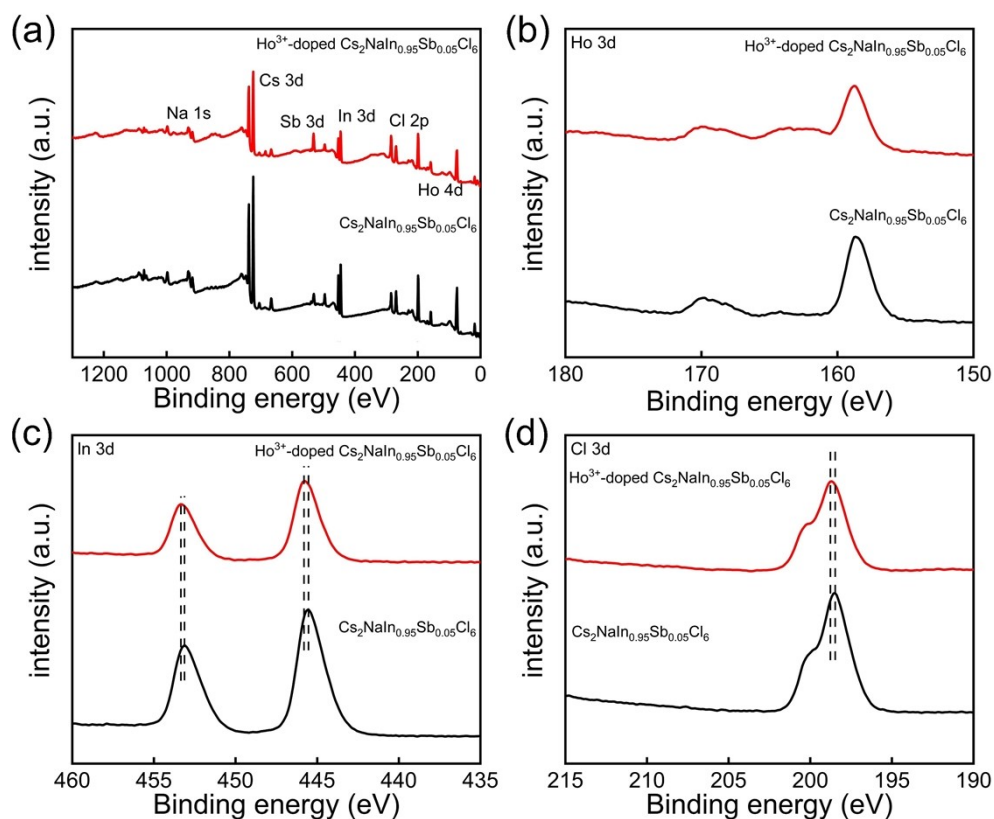

**Figure S5.** a) The XPS spectroscopy based on undoped and 2.0 mmol  $\text{Ho}^{3+}$ -doped  $\text{Cs}_2\text{NaIn}_{0.95}\text{Sb}_{0.05}\text{Cl}_6$  crystal. b) the XPS pattern for Ho 3d, c) In 3d, and d) Cl 2p of the undoped and 2.0 mmol  $\text{Ho}^{3+}$ -doped  $\text{Cs}_2\text{NaIn}_{0.95}\text{Sb}_{0.05}\text{Cl}_6$  crystal.

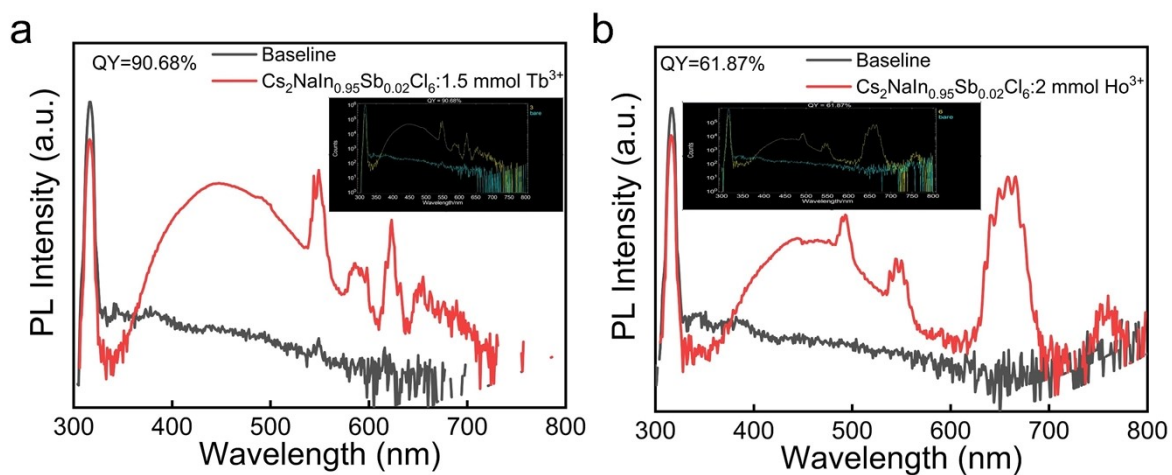

**Figure S6.** The PLQY of a) 1.5 mmol  $\text{Tb}^{3+}$ -doped  $\text{Cs}_2\text{NaIn}_{0.95}\text{Sb}_{0.05}\text{Cl}_6$ : crystal, and b) 2.0 mmol  $\text{Ho}^{3+}$ -doped  $\text{Cs}_2\text{NaIn}_{0.95}\text{Sb}_{0.05}\text{Cl}_6$  crystal.

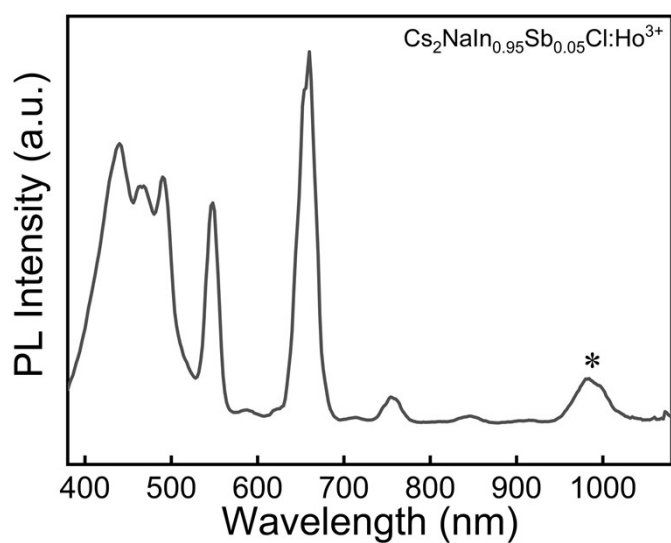

**Figure S7.** The near-infrared emission of 2.0 mmol  $\text{Ho}^{3+}$ -doped  $\text{Cs}_2\text{NaIn}_{0.95}\text{Sb}_{0.05}\text{Cl}_6$ .

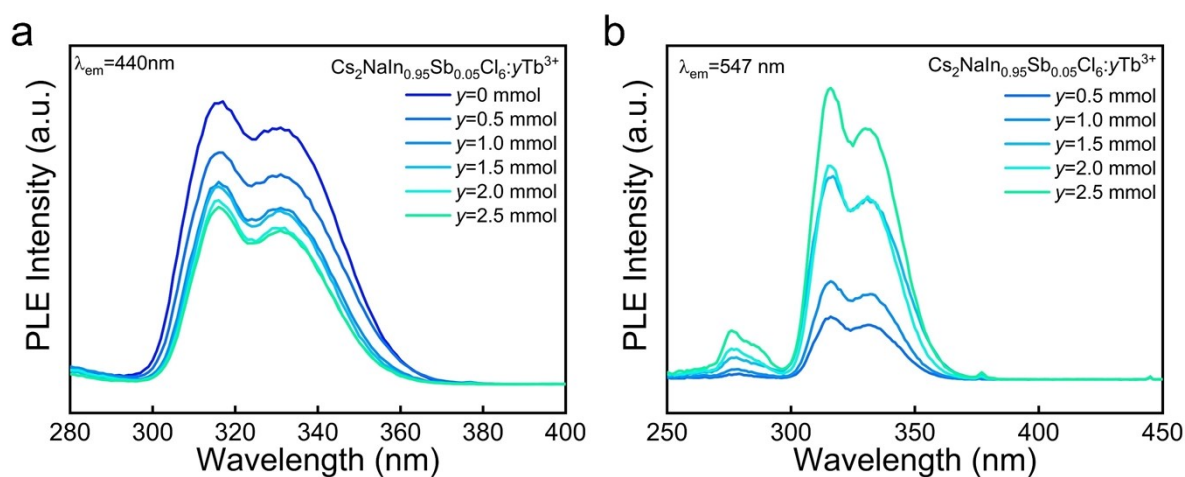

**Figure S8.** PLE spectra of  $\text{Cs}_2\text{NaIn}_{0.95}\text{Sb}_{0.05}\text{Cl}_6:y\text{Tb}^{3+}$  a) emission wavelength at 440 nm, and b) emission wavelength at 547 nm.

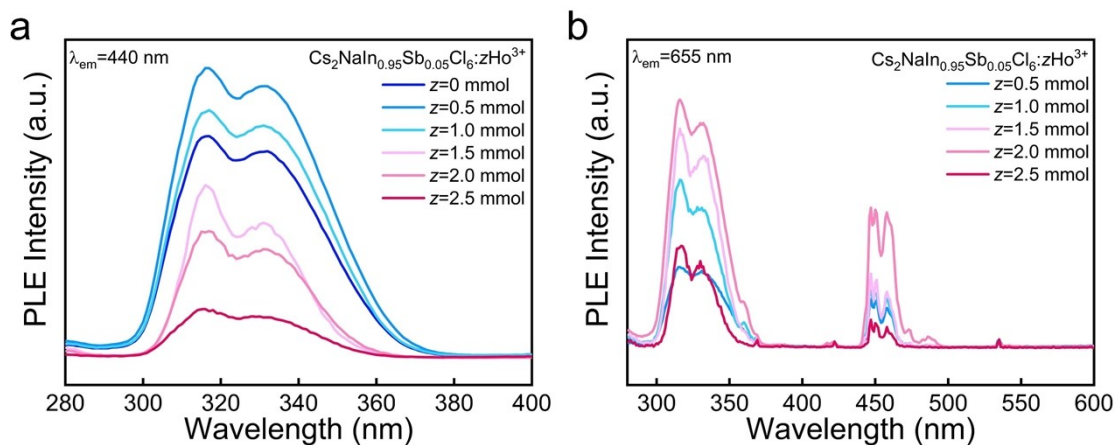

**Figure S9.** PLE spectra of  $\text{Cs}_2\text{NaIn}_{0.95}\text{Sb}_{0.05}\text{Cl}_6:\text{zHo}^{3+}$  a) emission wavelength at 440 nm, and b) emission wavelength at 655 nm.

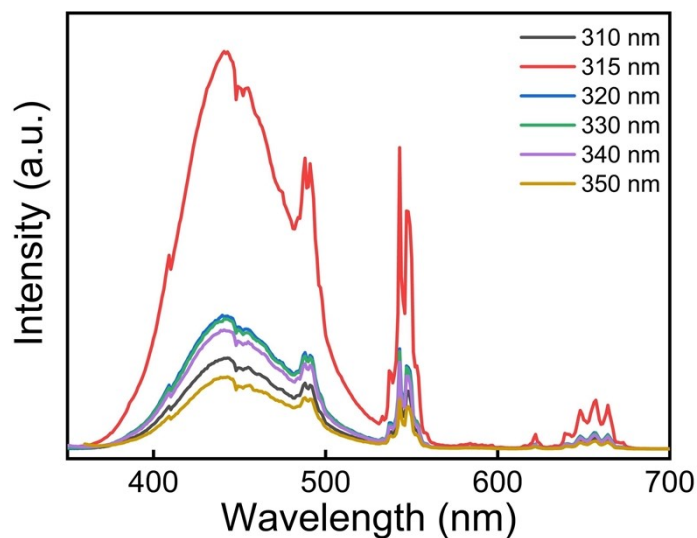

**Figure S10.** The PL spectra of  $\text{Cs}_2\text{NaIn}_{0.95}\text{Sb}_{0.05}\text{Cl}_6:1.5 \text{ mmol Tb}^{3+}$  crystal at different excitation wavelengths.



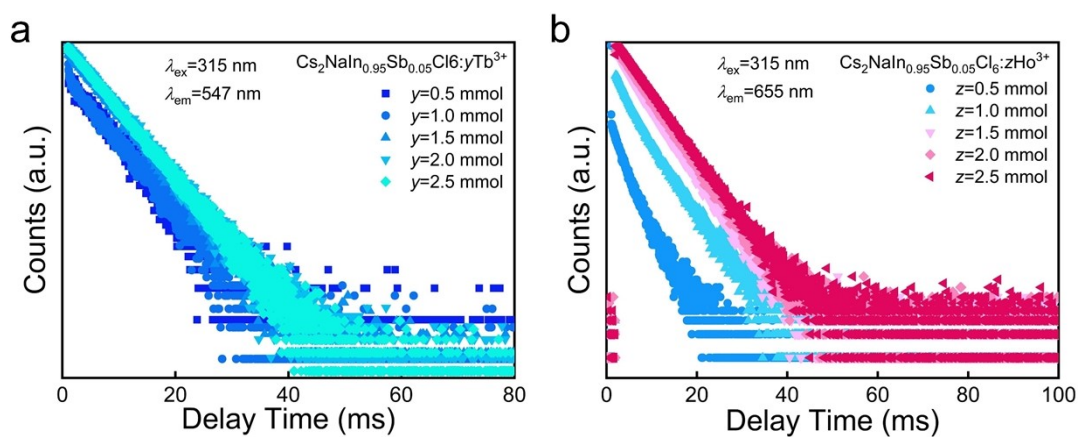

**Figure S11.** The TRPL curves of a)  $\text{Cs}_2\text{NaIn}_{0.95}\text{Sb}_{0.05}\text{Cl}_6:\text{yTb}^{3+}$  crystals at 547 nm, and b)  $\text{Cs}_2\text{NaIn}_{0.95}\text{Sb}_{0.05}\text{Cl}_6:\text{zHo}^{3+}$  crystals at 655 nm.

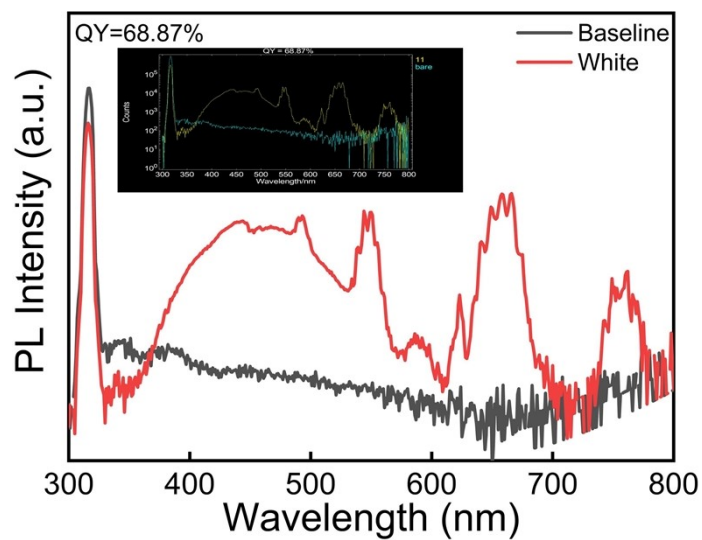

**Figure S12.** The PLQY curve of  $\text{Tb}^{3+}$  and  $\text{Ho}^{3+}$  co-doped  $\text{Cs}_2\text{NaIn}_{0.95}\text{Sb}_{0.05}\text{Cl}_6$  sample.

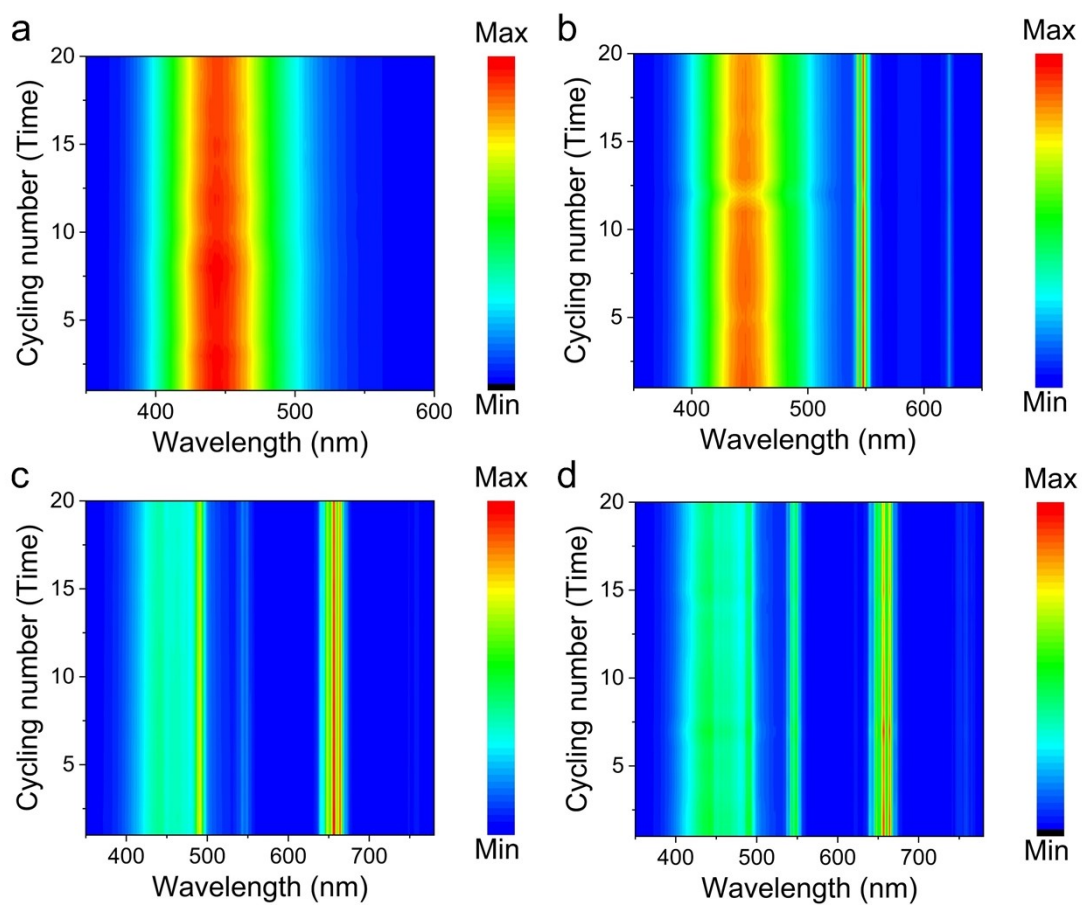

**Fig S13.** The luminescence thermal stability of 20 cold and hot cycles. The PL spectra of a)  $\text{Cs}_2\text{NaIn}_{0.95}\text{Sb}_{0.05}\text{Cl}_6$ , b)  $\text{Tb}^{3+}$ -doped  $\text{Cs}_2\text{NaIn}_{0.95}\text{Sb}_{0.05}\text{Cl}_6$ , c)  $\text{Ho}^{3+}$ -doped  $\text{Cs}_2\text{NaIn}_{0.95}\text{Sb}_{0.05}\text{Cl}_6$ , and d)  $\text{Tb}^{3+}$  and  $\text{Ho}^{3+}$  co-doped  $\text{Cs}_2\text{NaIn}_{0.95}\text{Sb}_{0.05}\text{Cl}_6$  samples.

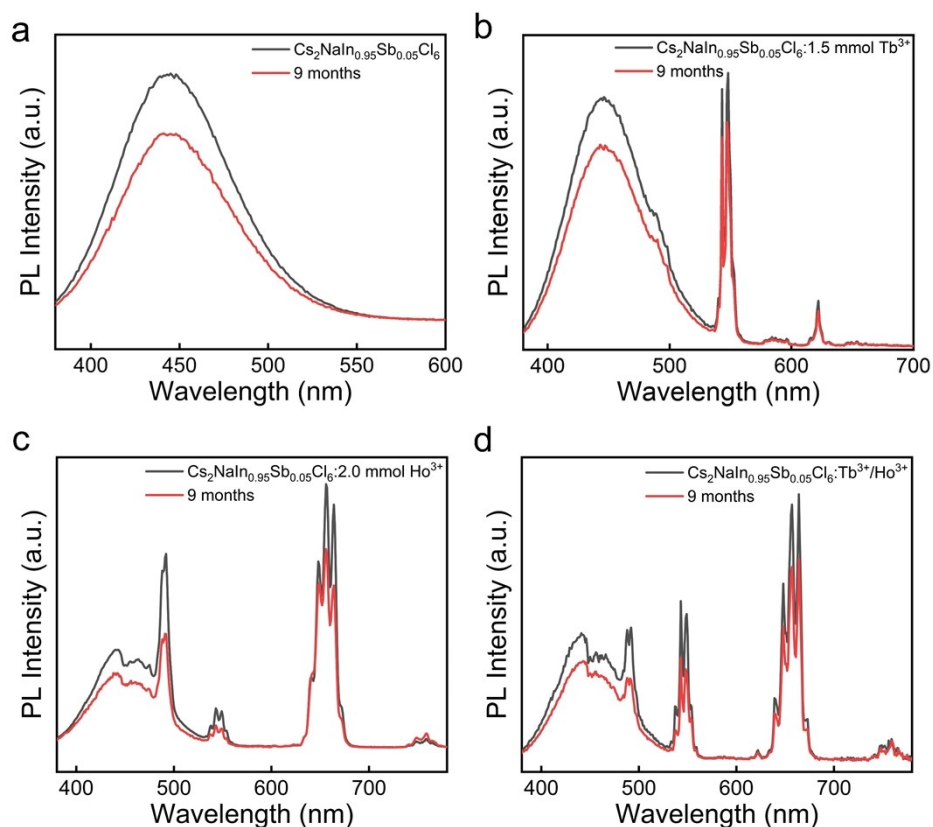

**Figure S14.** The humidity stability of the prepared phosphor storage in the air for 270 days. The PL spectra of a)  $\text{Cs}_2\text{NaIn}_{0.95}\text{Sb}_{0.05}\text{Cl}_6$ , b)  $\text{Tb}^{3+}$ -doped  $\text{Cs}_2\text{NaIn}_{0.95}\text{Sb}_{0.05}\text{Cl}_6$ , c)  $\text{Ho}^{3+}$ -doped  $\text{Cs}_2\text{NaIn}_{0.95}\text{Sb}_{0.05}\text{Cl}_6$ , and d)  $\text{Tb}^{3+}/\text{Ho}^{3+}$  co-doped  $\text{Cs}_2\text{NaIn}_{0.95}\text{Sb}_{0.05}\text{Cl}_6$  samples.

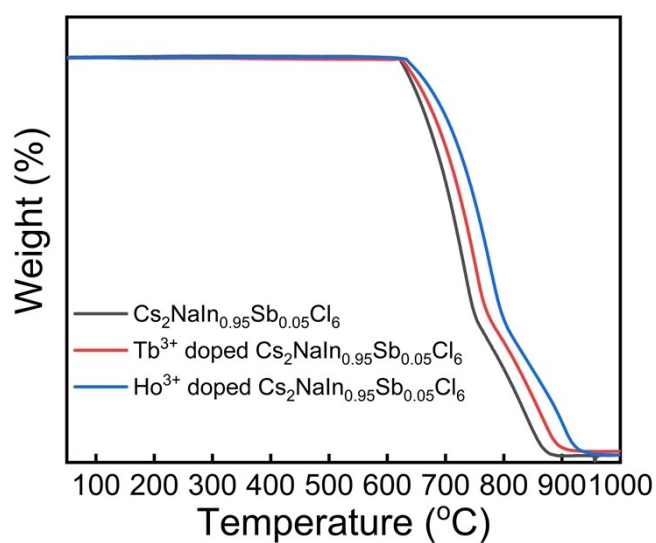

**Figure S15.** TGA curves of free-doped,  $\text{Tb}^{3+}$ -doped, and  $\text{Ho}^{3+}$ -doped  $\text{Cs}_2\text{NaIn}_{0.95}\text{Sb}_{0.05}\text{Cl}_6$  crystals

under N<sub>2</sub> atmosphere in the temperature range of 25-1000 °C at a heating rate of 10 °C min<sup>-1</sup>.
